# Supplementary material
Source: MDPI journal article supplement (https://www.mdpi.com/2673-8112/3/4/46)

# A Mediation Model of Self-Efficacy and Depression Between Burnout and Alcohol Consumption among Health Workers during Covid-19 Pandemic

Table S1. Descriptive statistics and reliability indexes.

|                   | N     | M    | S.D. | $\alpha$ | $\omega$ | Range    |      | Skewness | Kurtosis |
|-------------------|-------|------|------|----------|----------|----------|------|----------|----------|
|                   |       |      |      |          |          | Observed |      |          |          |
|                   |       |      |      |          |          | Min      | Max  |          |          |
| <hr/>             |       |      |      |          |          |          |      |          |          |
| 1. Emotional      |       |      |      |          |          |          |      |          |          |
| Exhaustion        | 3,856 | 1.22 | 0.68 | .87      | .88      | 0.00     | 3.00 | 0.28     | -0.46    |
| 2.                |       |      |      |          |          |          |      |          |          |
| Depersonalization | 3,856 | 0.40 | 0.52 | .83      | .83      | 0.00     | 3.00 | 1.44     | 2.30     |
| 3. Achievement    |       |      |      |          |          |          |      |          |          |
| Dissatisfaction   | 3,856 | 0.66 | 0.68 | .84      | .85      | 0.00     | 3.00 | 1.03     | 0.50     |
| 4. Depression     | 3,856 | 0.81 | 0.64 | .90      | .91      | 0.00     | 3.00 | 0.70     | -0.14    |
| 5. Self-efficacy  | 3,856 | 2.16 | 0.67 | .86      | .87      | 0.00     | 3.00 | -0.74    | 0.50     |
| 6. Alcohol        |       |      |      |          |          |          |      |          |          |
| Consumption       | 3,856 | 0.33 | 0.31 | .81      | .83      | 0.10     | 3.00 | 2.73     | 10.90    |

*Note:*  $\alpha$  refers to Cronbach's formula and  $\omega$  to McDonald's formula. The scores are mean-centered for direct comparison.

Table S2. Pearson's correlations across composite variables.

|                                | 1    | 2    | 3    | 4    | 5    |
|--------------------------------|------|------|------|------|------|
| 1. Emotional Exhaustion        | -    |      |      |      |      |
| 2. Depersonalization           | .48  | -    |      |      |      |
| 3. Achievement Dissatisfaction | .56  | .50  | -    |      |      |
| 4. Depression                  | .66  | .46  | .52  | -    |      |
| 5. Self-efficacy               | -.32 | -.29 | -.30 | -.37 | -    |
| 6. Alcohol Consumption         | .18  | .20  | .18  | .21  | -.12 |

*Note:* All coefficient were statistically significant at  $p < .001$

Table S3. Convergent and discriminant evidence of validity.

|                         | CR  | AVE | 1     | 2     | 3     | 4     | 5     | 6     |
|-------------------------|-----|-----|-------|-------|-------|-------|-------|-------|
| 1. Emotional Exhaustion | .88 | .59 | (.77) | .56   | .66   | .74   | .37   | .21   |
| 2. Depersonalization    | .83 | .63 | .57   | (.79) | .60   | .54   | .34   | .25   |
| 3. Achievement          |     |     |       |       |       |       |       |       |
| Dissatisfaction         | .84 | .58 | .63   | .56   | (.76) | .60   | .35   | .21   |
| 4. Depression           | .91 | .58 | .70   | .51   | .54   | (.76) | .42   | .25   |
| 5. Self-efficacy        | .87 | .64 | -.34  | -.32  | -.32  | -.36  | (.80) | .15   |
| 6. Alcohol Consumption  | .84 | .34 | .20   | .24   | .18   | .25   | -.15  | (.59) |

*Note:* CR: Composed reliability; AVE= Average variance extracted. The values in parenthesis across the diagonal are the squared roots of the AVE. The values over the diagonal are the results of the heterotrait-monotrait ratio correlations, HTMT. The values below the diagonal are the correlation of the latent traits.

Table S4. Gender difference across composite variables.

|                      | Female (n=2,884) |      | Male (n=972) |      | t      | df    | p     | Cohen's <i>d</i> |
|----------------------|------------------|------|--------------|------|--------|-------|-------|------------------|
|                      | M                | S.D. | M            | S.D. |        |       |       |                  |
| 1. Emotional         |                  |      |              |      |        |       |       |                  |
| Exhaustion           | 1.28             | 0.67 | 1.06         | 0.67 | 8.74   | 3,854 | <.001 | .32              |
| 2. Depersonalization | 0.41             | 0.52 | 0.38         | 0.51 | 1.49   | 3,854 | .136  | .05              |
| 3. Achievement       |                  |      |              |      |        |       |       |                  |
| Dissatisfaction      | 0.66             | 0.68 | 0.66         | 0.68 | 0.01   | 3,854 | .991  | .01              |
| 4. Depression        | 0.86             | 0.64 | 0.66         | 0.6  | 8.68   | 1,771 | <.001 | .31              |
| 5. Self-efficacy     | 2.15             | 0.64 | 2.21         | 0.72 | -2.67  | 1,514 | .008  | -.11             |
| 6. Alcohol           |                  |      |              |      |        |       |       |                  |
| Consumption          | 0.30             | 0.26 | 0.44         | 0.38 | -10.81 | 1,304 | <.001 | -.48             |

*Note:* All scores are mean-centered.

Table S5. Working-area difference across composite variables.

|                   | Clinical &<br>Medical Care<br>(n=2,079) |      | Administrative<br>Position<br>(n=1,081) |      | Clinical &<br>Laboratory<br>Analyses<br>(n=69) |      | General<br>Services<br>(n=627) |      | <i>F</i> (3,<br>3852) | <i>p</i> | $\eta^2$ | post-<br>hoc |
|-------------------|-----------------------------------------|------|-----------------------------------------|------|------------------------------------------------|------|--------------------------------|------|-----------------------|----------|----------|--------------|
|                   | M                                       | S.D. | M                                       | S.D. | M                                              | S.D. | M                              | S.D. |                       |          |          |              |
| 1. Emotional      |                                         |      |                                         |      |                                                |      |                                |      |                       |          |          |              |
| Exhaustion        | 1.33                                    | 0.69 | 1.13                                    | 0.66 | 1.32                                           | 0.69 | 1.05                           | 0.62 | 37.77                 | <.001    | .029     | 1,3>4        |
| 2.                |                                         |      |                                         |      |                                                |      |                                |      |                       |          |          |              |
| Depersonalization | 0.43                                    | 0.53 | 0.39                                    | 0.51 | 0.36                                           | 0.45 | 0.33                           | 0.47 | 5.45                  | <.001    | .004     | 1>4          |
| 3. Achievement    |                                         |      |                                         |      |                                                |      |                                |      |                       |          |          |              |
| Dissatisfaction   | 0.67                                    | 0.68 | 0.66                                    | 0.69 | 0.88                                           | 0.73 | 0.59                           | 0.66 | 4.75                  | .003     | .004     | 1,2>3>4      |
| 4. Depression     | 0.85                                    | 0.65 | 0.76                                    | 0.63 | 0.84                                           | 0.65 | 0.75                           | 0.58 | 6.88                  | <.001    | .005     | 1>2,4        |

|                  |      |      |      |      |      |      |      |      |      |       |      |     |
|------------------|------|------|------|------|------|------|------|------|------|-------|------|-----|
| 5. Self-efficacy | 2.14 | 0.67 | 2.18 | 0.69 | 2.10 | 0.65 | 2.26 | 0.62 | 6.21 | <.001 | .005 | 1<4 |
| 6. Alcohol       |      |      |      |      |      |      |      |      |      |       |      |     |
| Consumption      | 0.33 | 0.30 | 0.36 | 0.34 | 0.38 | 0.32 | 0.30 | 0.26 | 4.97 | .002  | .004 | 2>4 |

---

*Note:* All scores are mean-centered. Effect sizes are calculated by eta squared formula. Post-hoc analyses are calculated by means of Tukey formula.

**Figure S1. Participant selection flow chart.**

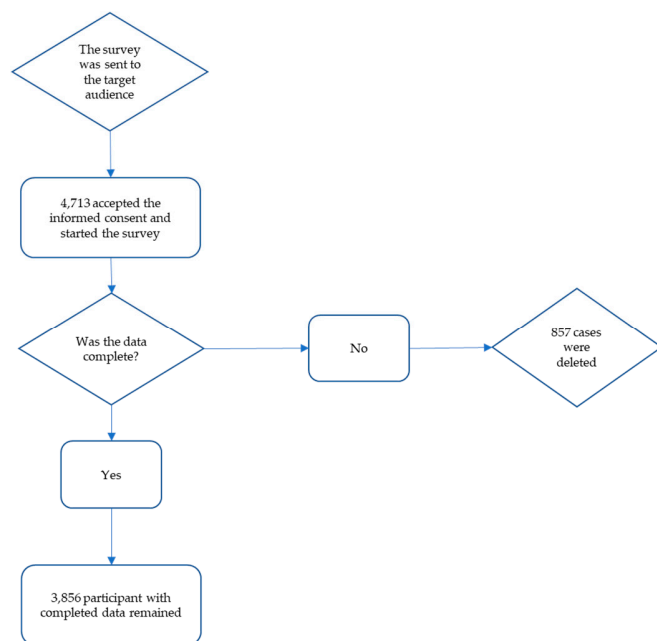

Supplement: s1 [file s1]
